# Supplementary material for: Elucidation of the Hydrogen Evolution Reaction on a Photochemical Molecular Device
Source: Research Square preprint supplement (doi:10.21203/rs.3.rs-5775846/v1), 2025-09-26
Supplement: Supplementary file 1 [file be6ad962ca9c2e03093cc1bf.pdf]

# Supporting Information: Elucidation of the Hydrogen Evolution Reaction on a Photochemical Molecular Device

Miftahussurur Hamidi Putra,<sup>†</sup> Alexander K. Mengele,<sup>‡</sup> Benedikt Bagemihl,<sup>‡</sup> Sven  
Rau,<sup>‡</sup> Michael Busch,<sup>†,¶,§</sup> and Axel Groß<sup>\*,†,||</sup>

*<sup>†</sup>Institute of Theoretical Chemistry, Ulm University, 89081 Ulm, Germany*

*<sup>‡</sup>Institute of Inorganic Chemistry I, Materials and Catalysis, Ulm University, 89081 Ulm,  
Germany*

*<sup>¶</sup>Division of Materials Science, Department of Engineering Sciences and Mathematics,  
Luleå University of Technology, 971 87 Luleå, Sweden*

*<sup>§</sup>Wallenberg Initiative Materials Science for Sustainability (WISE), Luleå University of  
Technology, 971 87 Luleå, Sweden*

*<sup>||</sup>Helmholtz Institute Ulm (HIU), Electrochemical Energy Storage, 89069 Ulm, Germany*

E-mail: axel.gross@uni-ulm.de

## S1 Methodology for Calculating $\text{pK}_a$

To measure the capability of the intermediates to react with a proton, we calculate here the  $\text{pK}_a$  using the methodology that was developed by Busch and coworkers.<sup>1–3</sup> The approach is based on a thermodynamic cycle that represents acid dissociation as a sequence of proton-

coupled electron transfer (PCET) oxidation steps.

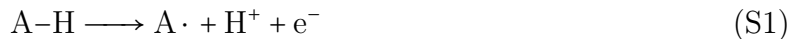

and an electron transfer (eT) reduction reaction in the solvent of interest, here is acetonitrile.

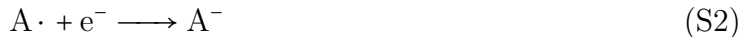

To calculate the electrochemical potential of the electron transfer (eT) step, one needs information about the (effective) absolute potential ( $E_{\text{abs,eff}}(\text{SHE})$ ) that links the absolute reaction energy to the standard hydrogen electrode (SHE) by using equation.

$$E_{\text{abs,eff}}(\text{SHE}) = -nF[0.5G(\text{H}_2) + G(\text{A}^-) - G(\text{A-H}) - \Delta G(\text{Diss.})] \quad (\text{S3})$$

Here,  $n$  represents the number of transferred electrons ( $n=1$ ),  $F$  stands for the Faraday constant, and  $G(\text{H}_2)$ ,  $G(\text{A}^-)$ , and  $G(\text{A-H})$  refer to the total Gibbs free energies of hydrogen, the reference acid, and its corresponding base, respectively. These values are obtained from calculations assuming the solvent in which the experimental measurement has been conducted (typically water). Finally,  $\Delta G(\text{Diss.})$  is the experimental Gibbs free energy derived from an experimental  $\text{pK}_a$  measurement in  $\text{H}_2\text{O}$ :

$$\Delta G(\text{Diss.}) = RT[\text{pKa}(\text{ref.})] \ln 10 \quad (\text{S4})$$

with  $\text{pKa}(\text{ref.})$  here the reference  $\text{pK}_a$  value from the experimental result. In this work, we use  $\text{pK}_a$  of formic acid ( $\text{pKa} = 3.77^4$ ) on water as reference.

Then, leveraging the effective absolute potential, the Gibbs Free energy of the (eT) reduction step ( $\Delta G(\text{ET})$ ) is then determined using equation S5:

$$\Delta G(\text{ET}) = G(\text{A}^-) - G(\text{A}\cdot) + \frac{E_{\text{abs,eff}}(\text{SHE})}{nF} \quad (\text{S5})$$

This method relies on the absolute potential in water. Thus, it will predict the potential versus the SHE in water, despite using the solvation model parameters of the non-aqueous solvent of interest.

This is opposed to the redox potential of the PCET oxidation step ( $\Delta G(\text{PCET})$ ) which is computed using the computational normal hydrogen electrode.<sup>5</sup> This method uses  $\text{H}_2$  in the gas phase as a reference.

$$\Delta G(\text{PCET}) = G(\text{A}^\cdot) + 0.5G(\text{H}_2) - G(\text{A-H}) - RT \ln [\text{H}^+] \quad (\text{S6})$$

The term " $RT \ln([\text{H}^+])$ " is derived from the Nernst equation and accounts for the pH dependence of PCET steps. When considering standard conditions ( $\text{pH} = 0$ ), this term equals zero. As the solvent affects the system exclusively through the selected solvation model, the prediction of PCET steps is developed in relation to the Standard Hydrogen Electrode (SHE) in the solvent of interest. Consequently, the Born-Haber cycle, which connects the PCET and (eT) steps with the acid dissociation reaction ( $\Delta G(\text{Diss.})$ ), is no longer solely determined by the sum of the energetics of the electrochemical steps. Instead, it requires an adjustment through a conversion factor to account for the disparities in proton solvation energy between water and the solvent of interest (referred to as "SolvX"). This correction aligns both reactions on the same reference scale in equation S7.

$$\Delta G(\text{Diss.}) = \Delta G(\text{eT}) + \Delta G(\text{PCET}) + \Delta G_{\text{conv.}}^{\text{SHE;SolvX}} \quad (\text{S7})$$

The difference between the reference solvent of the SHE can be exploited to compute the (effective) proton solvation energy in the solvent of interest ("SolvX") via equation S8:

$$\Delta G_{\text{conv.}}^{\text{SHE;SolvX}} = G(\text{A-H; SolvX}) - 0.5G(\text{H}_2) - G(\text{A}^-; \text{SolvX}) - \frac{E_{\text{abs,eff}}(\text{SHE})}{F} \quad (\text{S8})$$

and equation S9:

$$G_{\text{eff}}^{\text{SolvX}}(\text{H}^+) = 0.6G(\text{H}_2) + \frac{E_{\text{abs,eff}}(\text{SHE})}{F} - \Delta G_{\text{conv.}}^{\text{SHE;SolvX}} \quad (\text{S9})$$

Here,  $G(A - H; \text{SolvX})$  and  $G(A; \text{SolvX})$  correspond to the total Gibbs free energy of the reference acid from equation S3 in the considered solvent, while  $\Delta G_{\text{conv.}}^{\text{SHE;SolvX}}$  is the conversion factor between different solvents. The obtained effective proton solvation energy can then be used to predict the  $\text{pK}_a$  in the solvent of interest. In this work, we obtained the proton solvation energy -11.19 eV (experiment -11.06 eV<sup>6,7</sup>). Then, the calculated  $\text{pK}_a$  is determined by this relation<sup>1-3</sup>

$$\text{pK}_a(\text{calc.}) = 0.75 \text{ pK}_a(\text{DFT}) + 3.2. \quad (\text{S10})$$

Here, we examined  $\text{pK}_a$  values for protonation of water, triethylamine ( $\text{NEt}_3$ ), and acetonitrile in acetonitrile. Our DFT calculations revealed that the protonated water ( $\text{H}_3\text{O}^+$ ) and acetonitrile ( $\text{MeCNH}^+$ ) had remarkably low  $\text{pK}_a$  values of -5.4 and -0.8, respectively, making them hindered protonation sites. In contrast,  $\text{NEt}_3\text{H}^+$  displayed a high  $\text{pK}_a$  of 17.0 (exp. 18.8<sup>8</sup>), indicating a strong propensity for proton bonding compared to water and acetonitrile. It means, for the photocatalytic process on  $[(\text{tbbpy})_2\text{Ru}(\text{tpphz})\text{PtI}_2]^{2+}$  (**RuPtI<sub>2</sub>**;  $\text{tbbpy} = 4,4'$ -di-tert-butyl-2,2'-bipyridine;  $\text{tpphz} = \text{tetrapyrido}[3,2\text{-a}:2',3' - c:3''''\text{-h}:2''',3'''\text{-j}]\text{phenazine}$ ), the  $\text{pK}_a$  value of the proton bound to the catalyst side of **RuPtI<sub>2</sub>** must exceed the  $\text{pK}_a$  of  $\text{NEt}_3\text{H}^+$ .



## S2 Mulliken charge and Spin Density

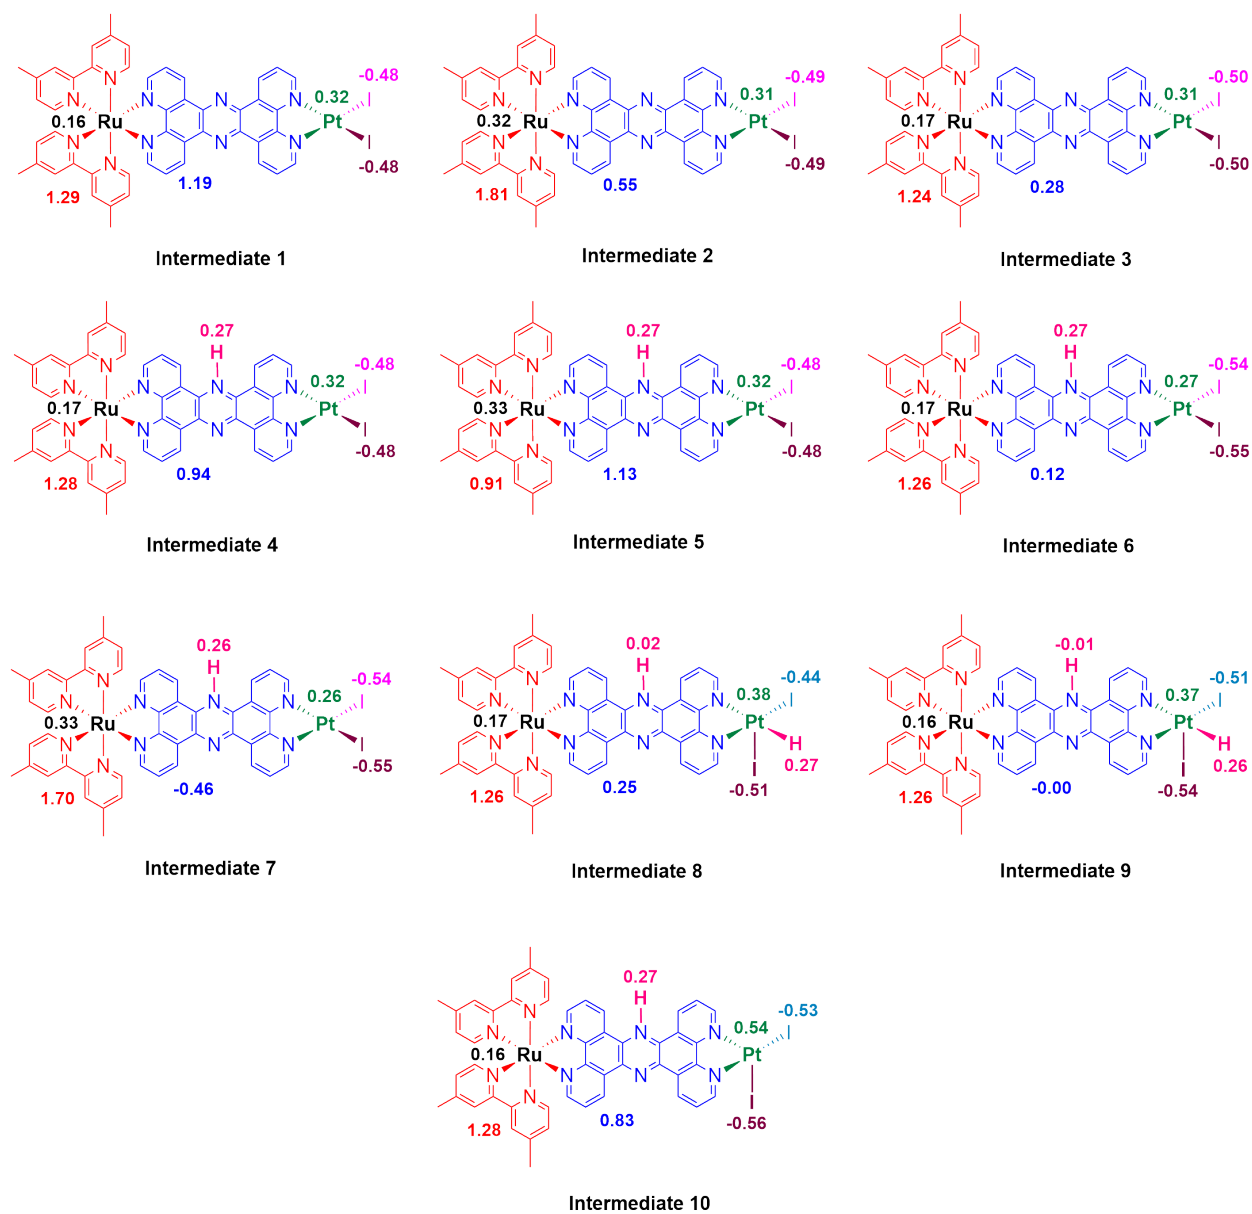

Figure S1: Mulliken charge of the intermediates on the Scheme 1.

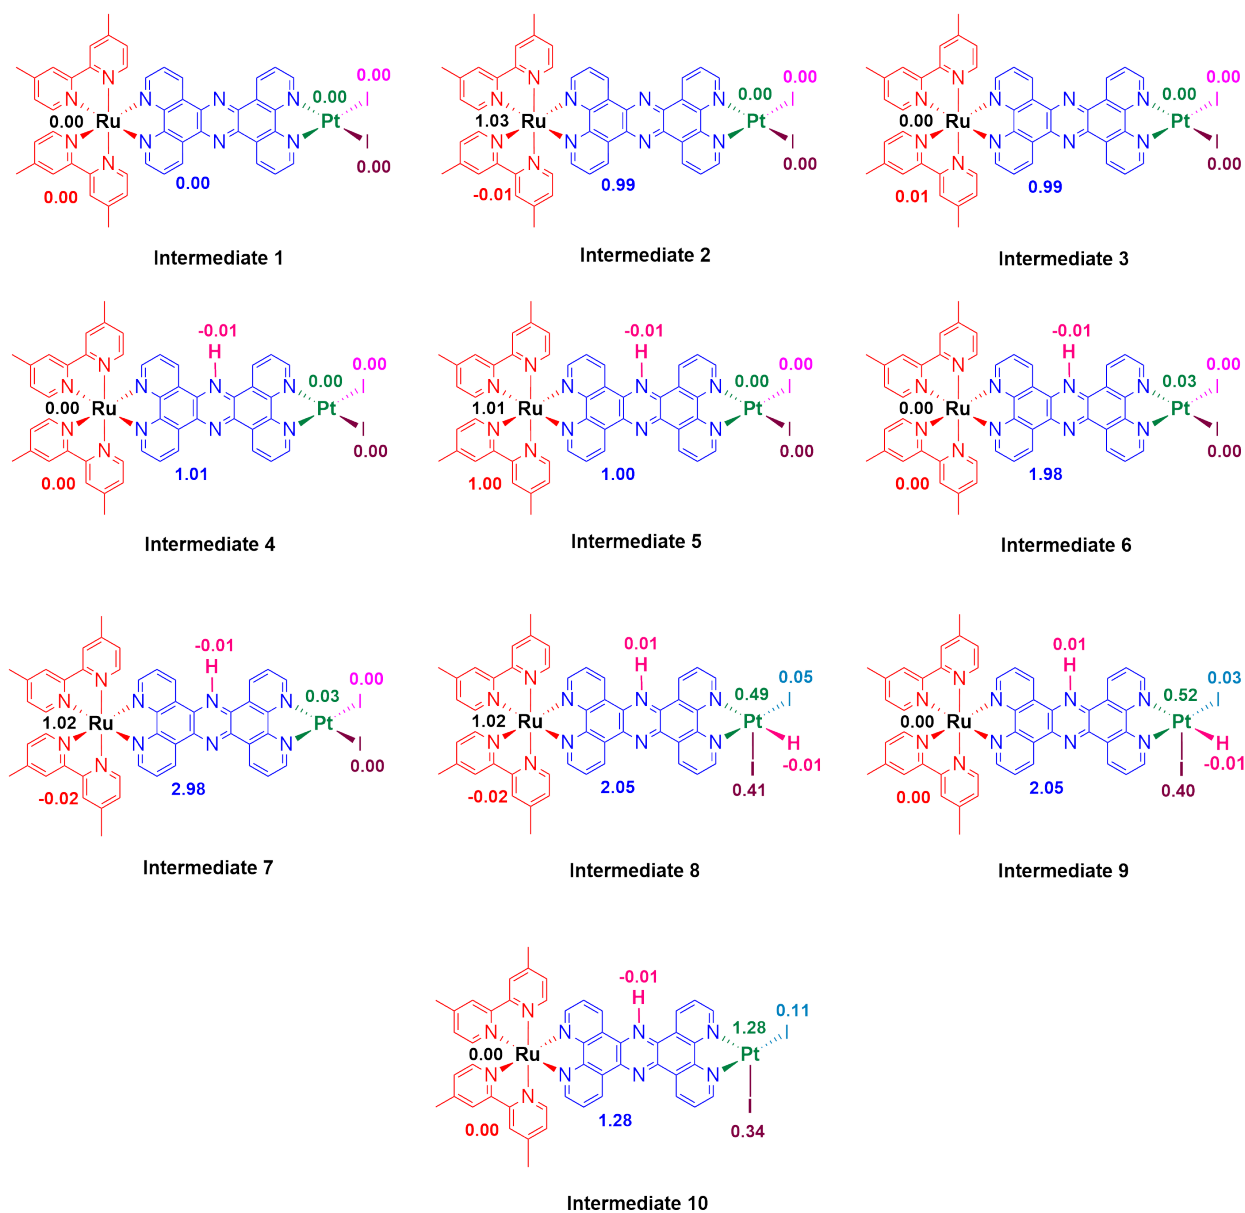

Figure S2: Spin number of the intermediates on the Scheme 1.

## S3 The Reaction Energetics

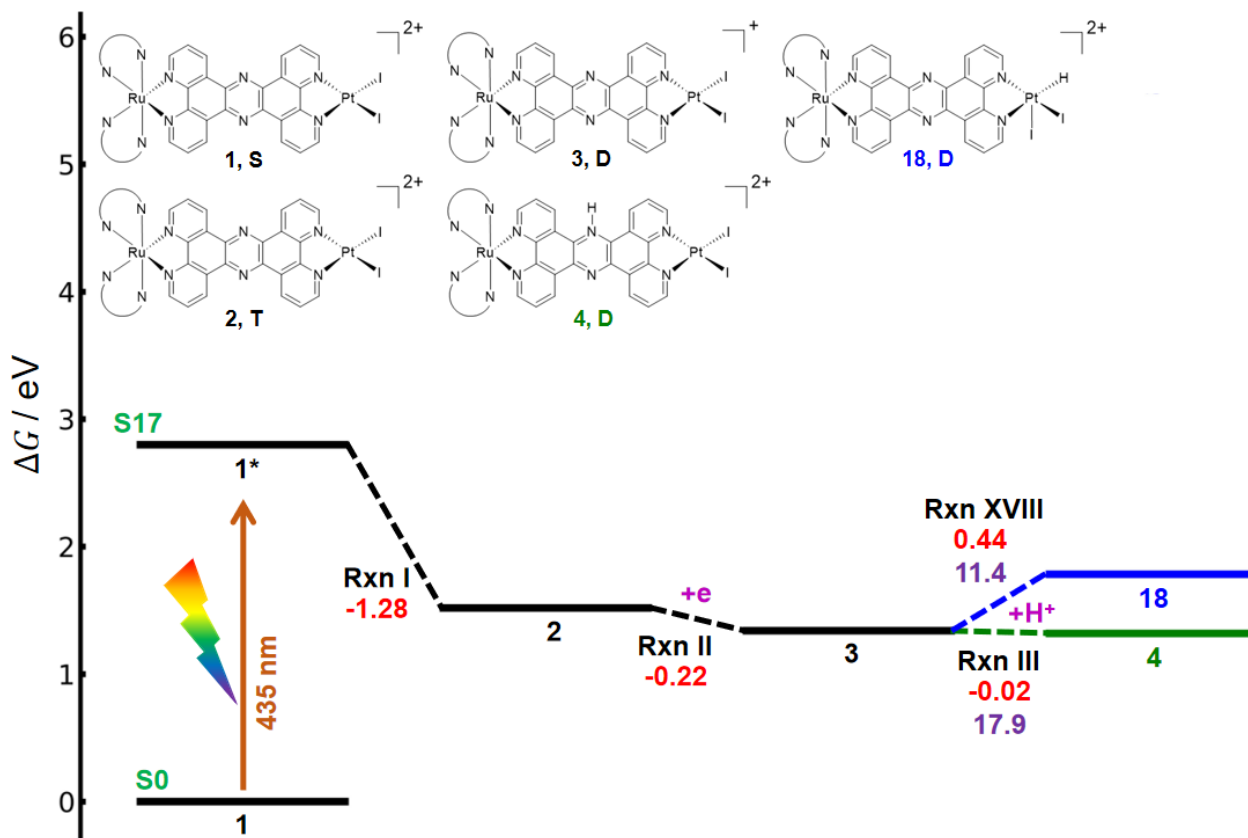

Scheme S1: The reaction energetics on singly reduced doublet state of  $\text{RuPtI}_2$ . The number of intermediates and their spin state are written below the molecules with S = singlet, T = triplet, D = doublet. This  $pK_a$  calculation is applied to the protonation on the bridging ligand and Platinum catalyst. According to our calculation, the protonation occurs only on the tpphz since the  $pK_a$  has a larger value than the  $pK_a$  of  $\text{HNEt}_3^+$  ( $pK_a = 17.6$ ). Here, the transition state for Rxn III is not displayed and already shown on the manuscript.

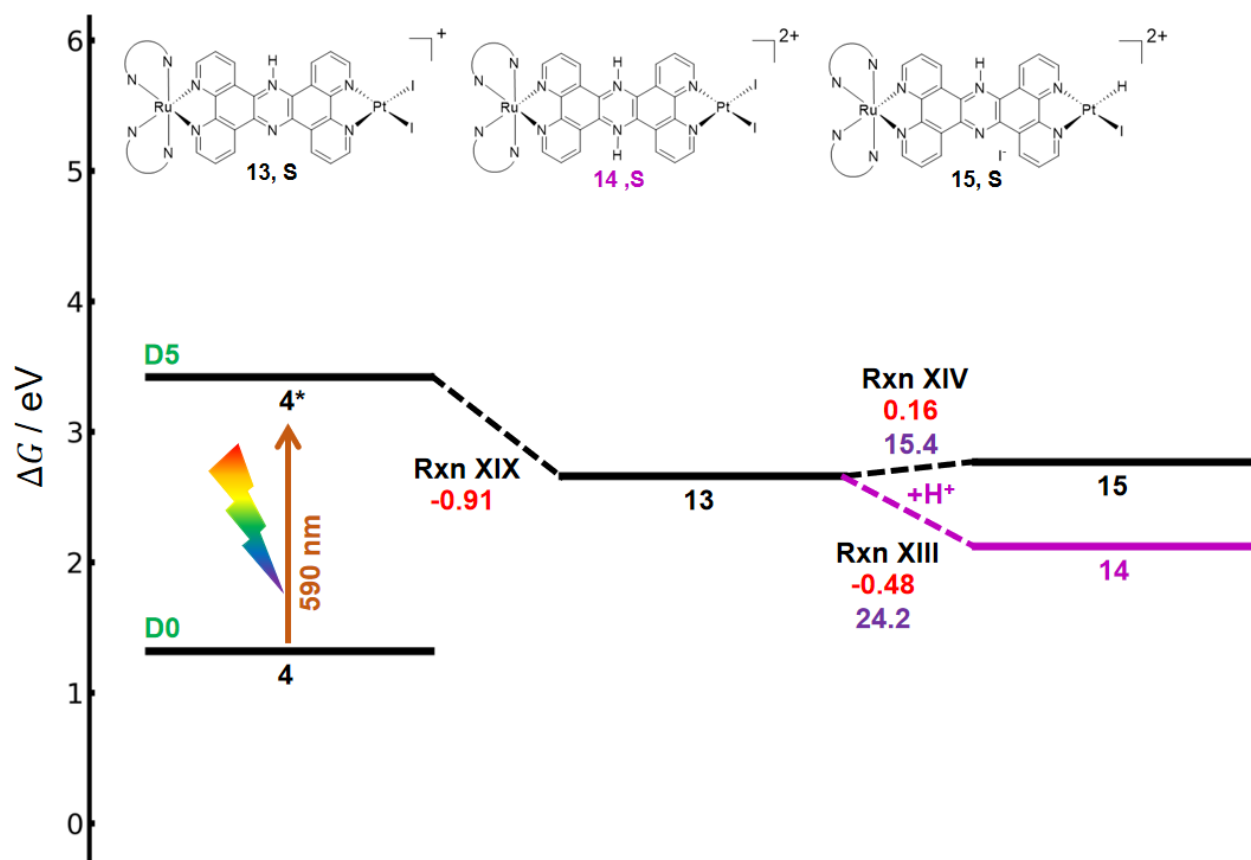

Scheme S2: The reaction energetics of protonation on doubly reduced singlet state of **RuPtI<sub>2</sub>**. The number of intermediates and their spin state are written below the molecules with S = singlet, D = doublet, and L = loss of I<sup>−</sup> ligand. According to our calculation, the second protonation on the bridge has pK<sub>a</sub> much larger than pK<sub>a</sub> value of HNet<sub>3</sub><sup>+</sup>. In addition, protonation on the Pt-catalyst leads to the release of iodide ligand.

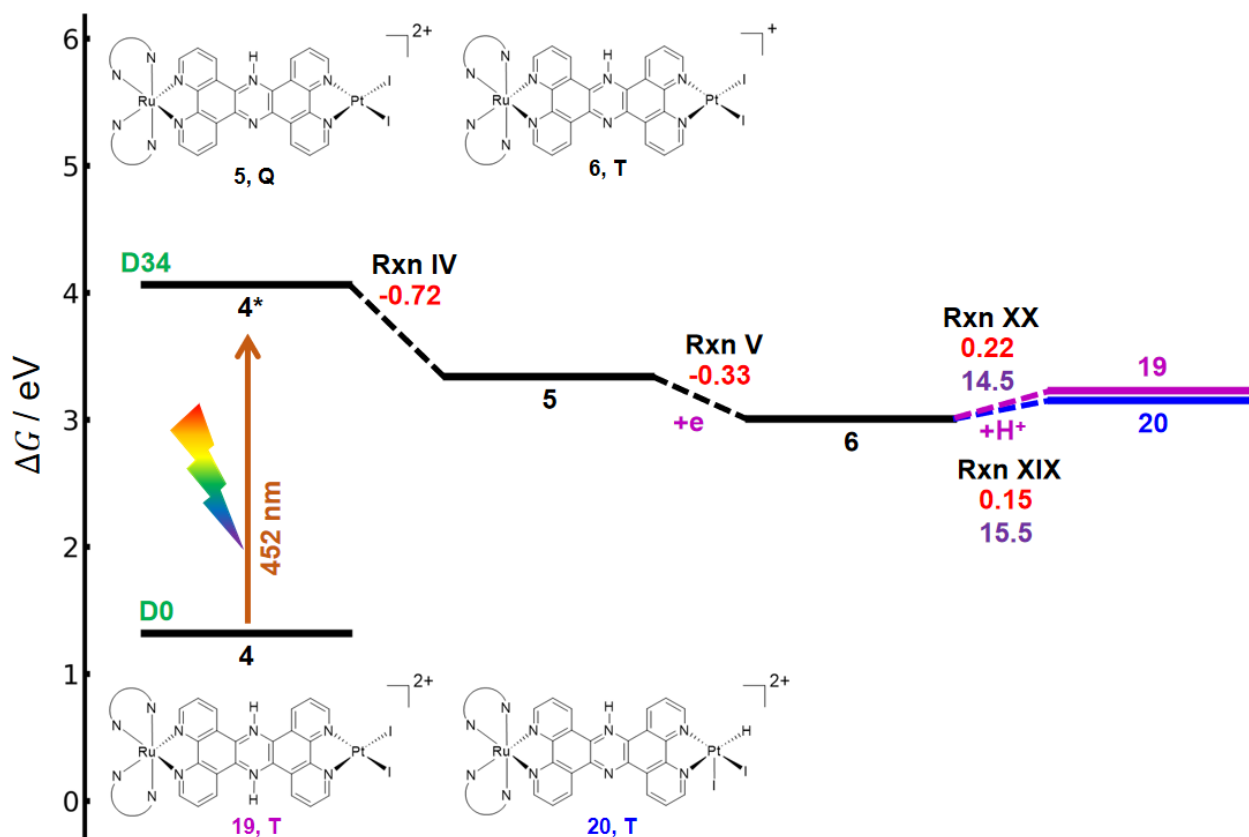

Scheme S3: The reaction energetics of protonation on doubly reduced triplet state of  $\text{RuPtI}_2$ . The number of intermediates and their spin state are written below the molecules with T = triplet, D = doublet, and Q = quartet. This calculation is applied to the second protonation on the bridging ligand and first protonation on Pt-catalyst. From our calculation, the  $\text{pK}_a$  of protonation on both sites are still lower than  $\text{pK}_a$  value of  $\text{HNEt}_3^+$  ( $\text{pK}_a = 17.6$ ). Since the  $\text{pK}_a$  difference is around 2-3 units, therefore the intermediate **19** and **20** may be observed in minor amounts.

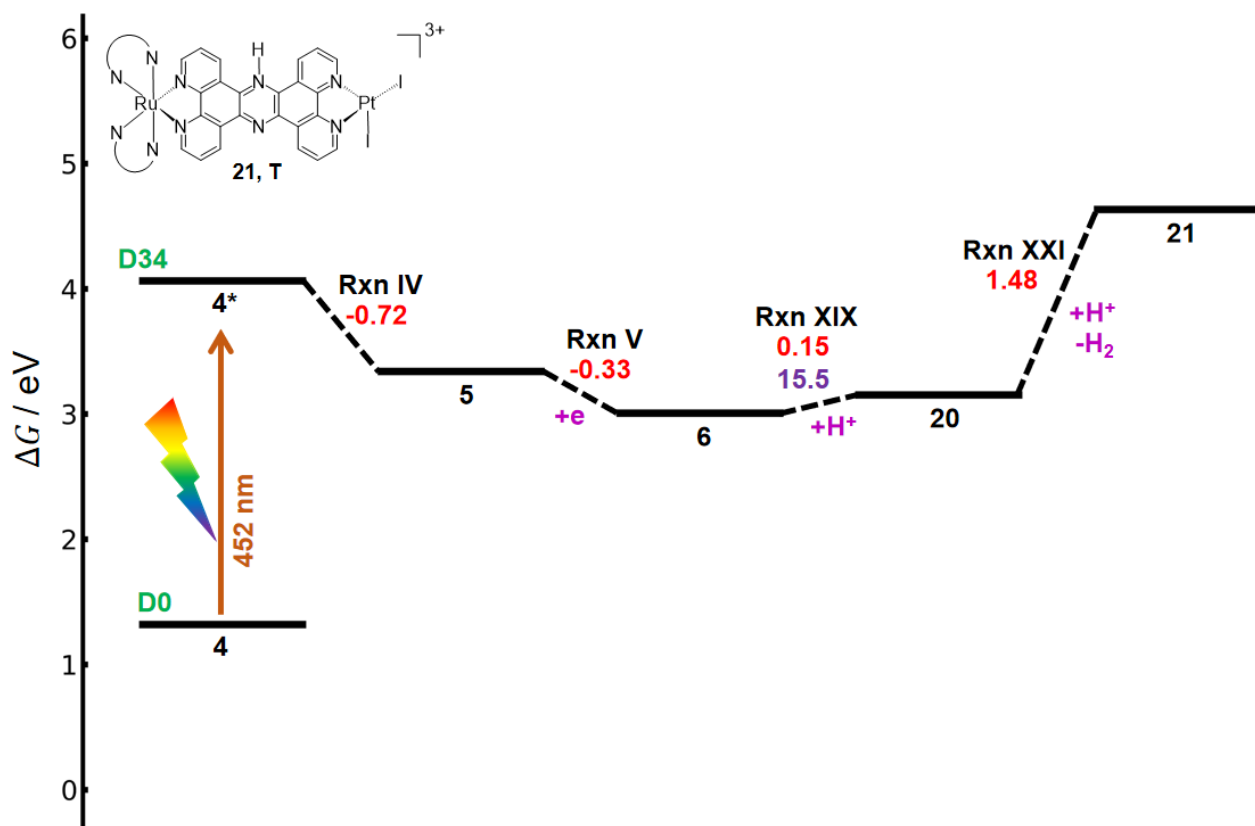

Scheme S4: The reaction energetics plot of the hydrogen production process from doubly reduced triplet state of  $\text{RuPtI}_2$ . The formation of hydrogen in this figure follows the Volmer-Heyrovsky path. The number of intermediates and their spin state are written below the molecules with T = triplet. According to our calculation, the free energy of hydrogen production is relatively high at a value of 1.48 eV. Therefore, the two-fold reduction process is not effective for hydrogen production.

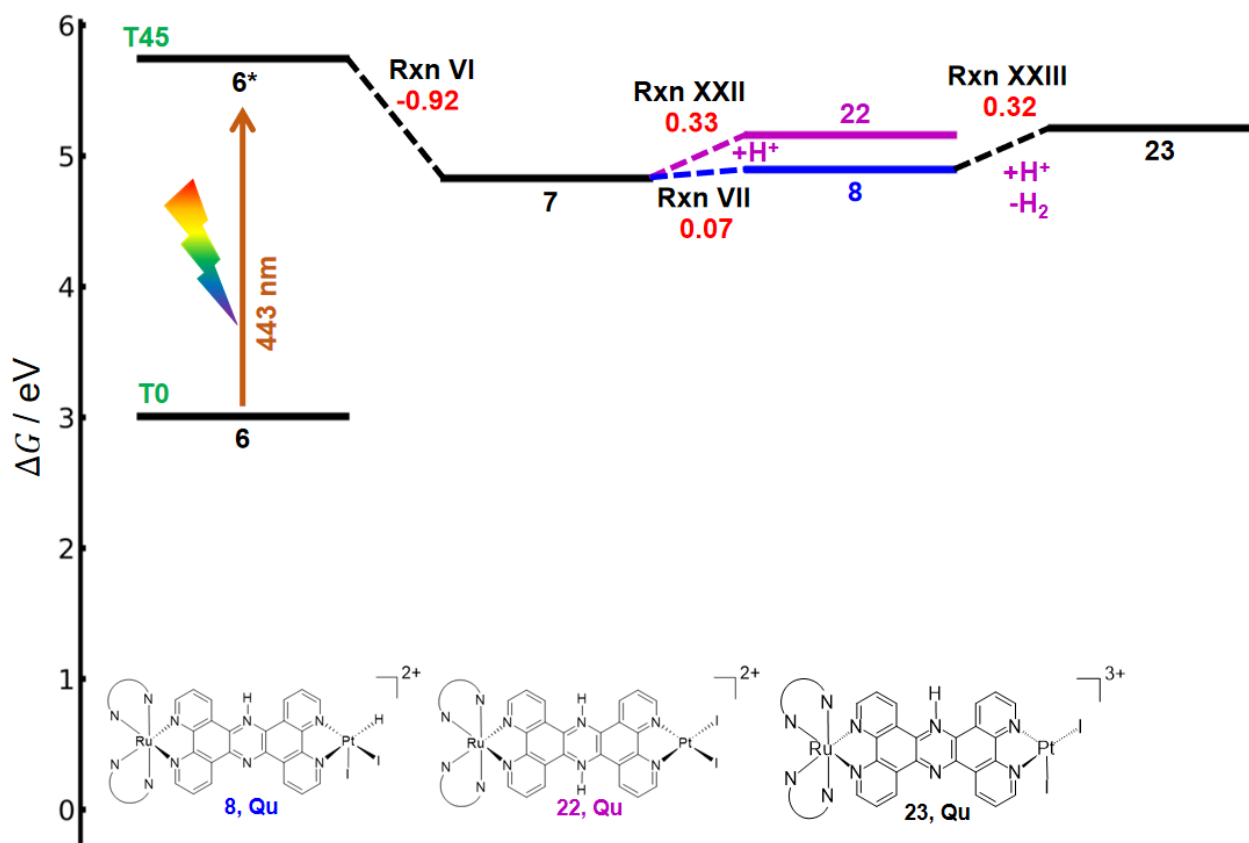

Scheme S5: The reaction energetics plot of the hydrogen production process from doubly reduced quintet state of  $\text{RuPtI}_2$ . The formation of hydrogen in this figure follows the Volmer-Heyrovsky path. The number of intermediates and their spin state are written below the molecules with T = triplet and Qu = quintet. Here, the transition state for Rxn VII is not displayed and already shown on the manuscript.

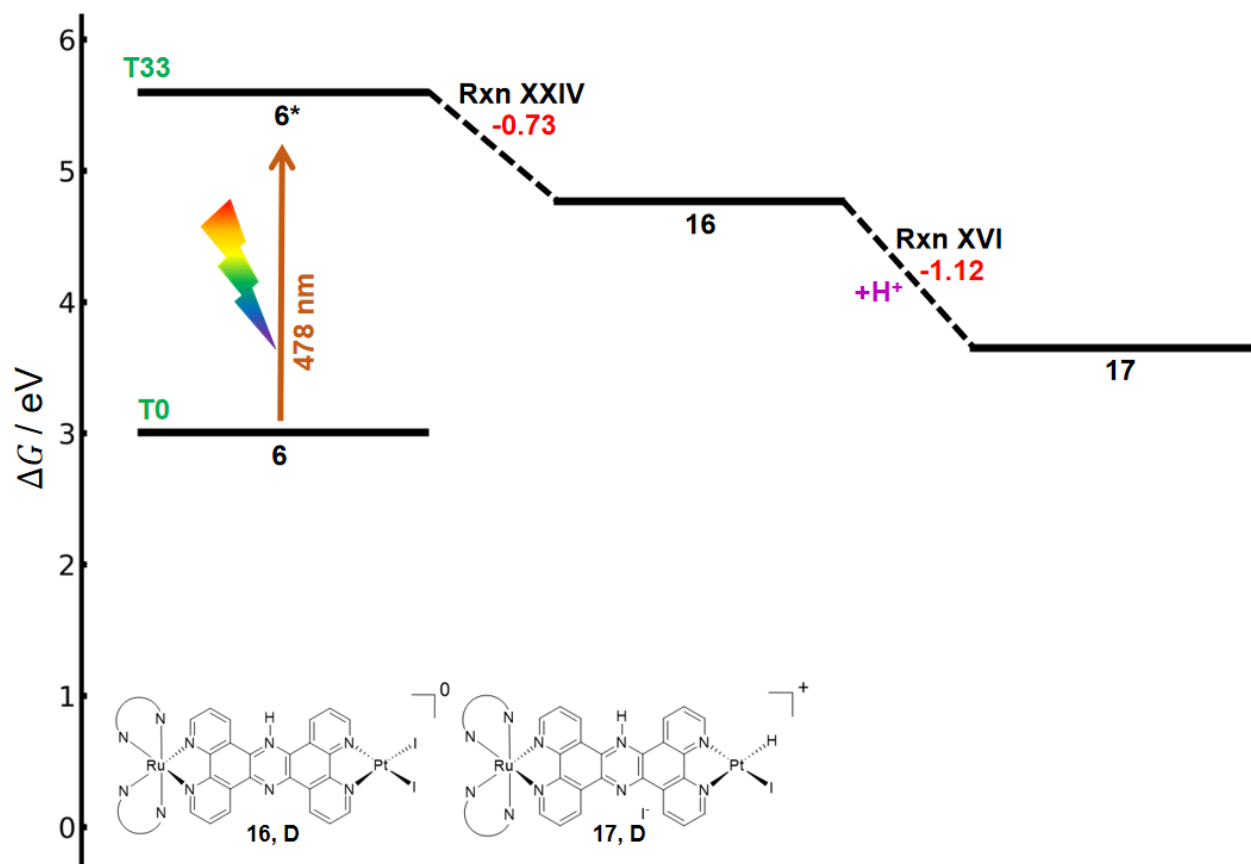

Scheme S6: The reaction energetics of protonation on triply reduced doublet state of  $\text{RuPtI}_2$ . The number of intermediates and their spin state are written below the molecules with T = triplet and D = doublet. According to our calculation, the protonation on Pt-catalyst yields the iodide ligand loss.



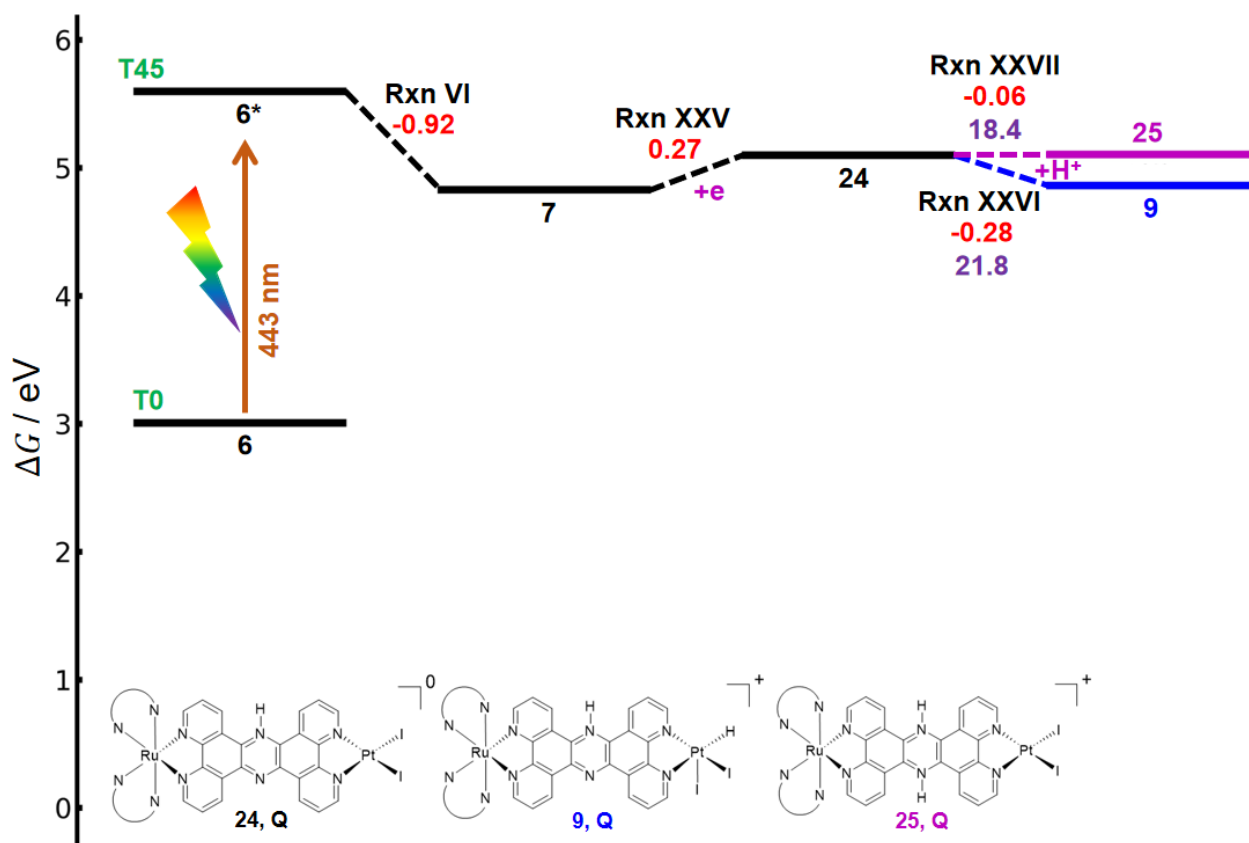

Scheme S7: The reaction energetics of protonation on triply reduced quartet state of **RuPtI<sub>2</sub>**. The number of intermediates and their spin state are written below the molecules with T = triplet, Q = quartet, and Qu = quintet. This calculation is applied to the second protonation on the bridging ligand and first protonation on Pt-catalyst. From our calculation, the  $pK_a$  of protonation on both sites are higher than  $pK_a$  value of  $\text{HNet}_3^+$  ( $pK_a = 17.6$ ). Since the  $pK_a$  of formation intermediate **9** is three  $pK_a$  units higher than the  $pK_a$  of formation intermediate **25**, therefore the deactivation process will be slower than the photocatalytic hydrogen evolution reaction.

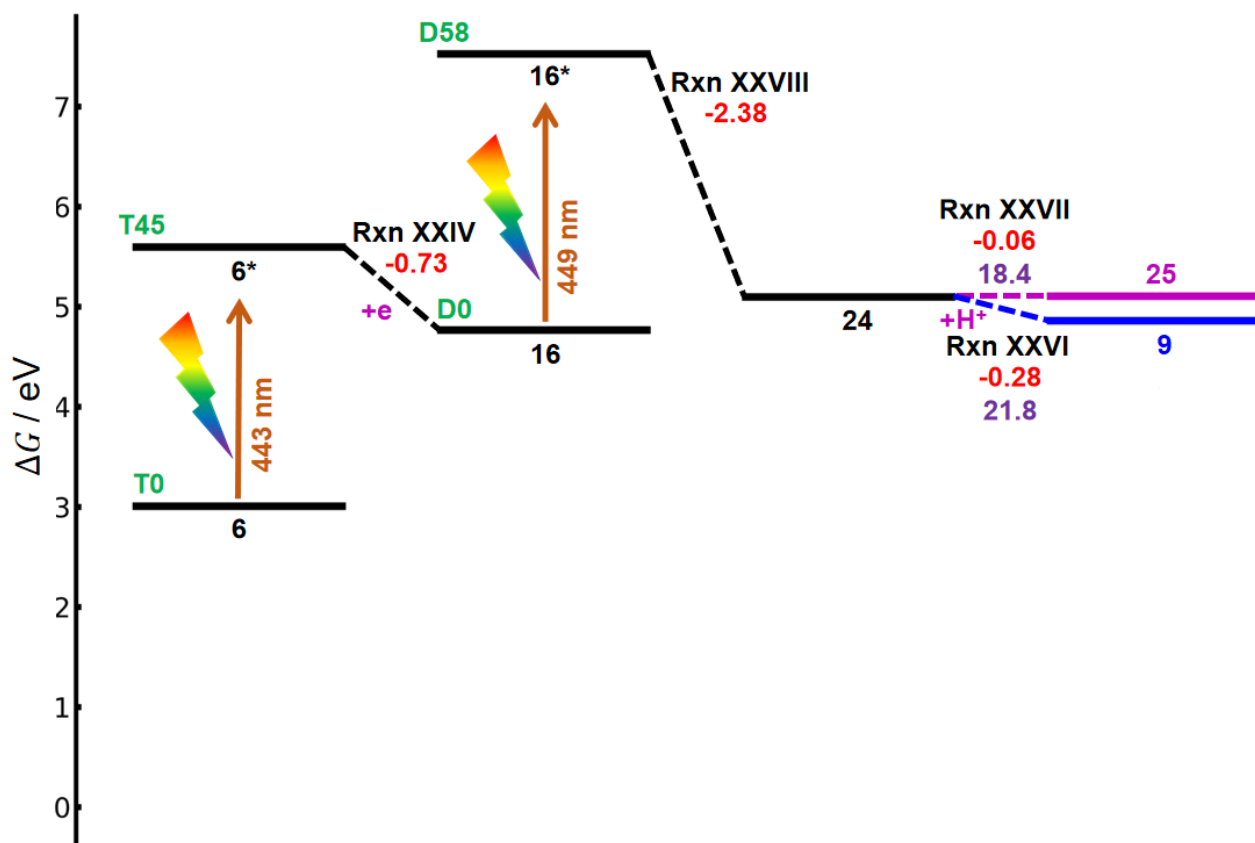

Scheme S8: The reaction energetics of protonation on triply reduced doublet state of  $\text{RuPtI}_2$ . The number of intermediates and their spin state are written below the molecules with T = triplet and D = doublet. According to our calculation, there is also an alternative due to fast intersystem crossing (ISC) of the  $\text{RuPtI}_2$  that can avoid the ligand loss.

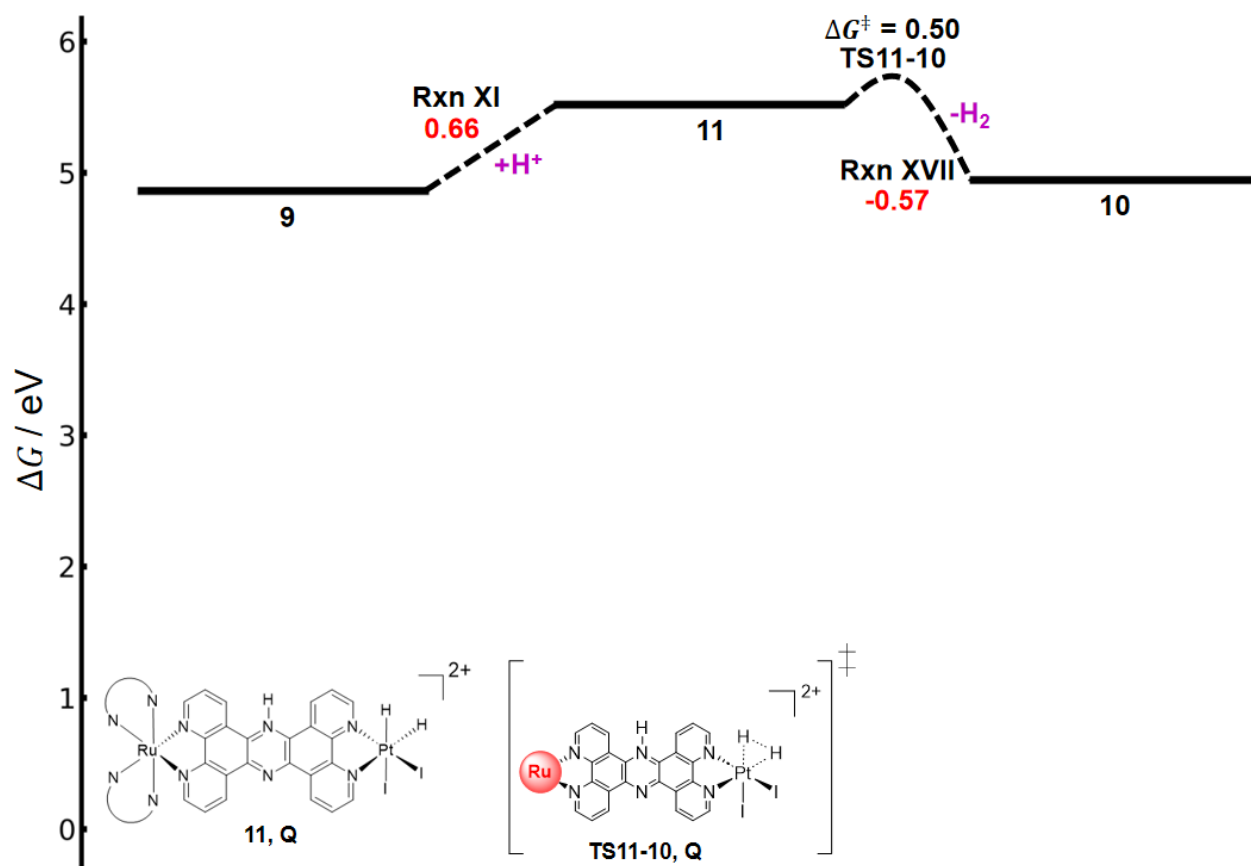

Scheme S9: The reaction energetics plot of hydrogen production process from triply reduced quartet state of  $\text{RuPtI}_2$ . The formation of hydrogen in this figure follows the Volmer-Tafel path. The number of intermediates and their spin state are written below the molecules with Q = quartet.

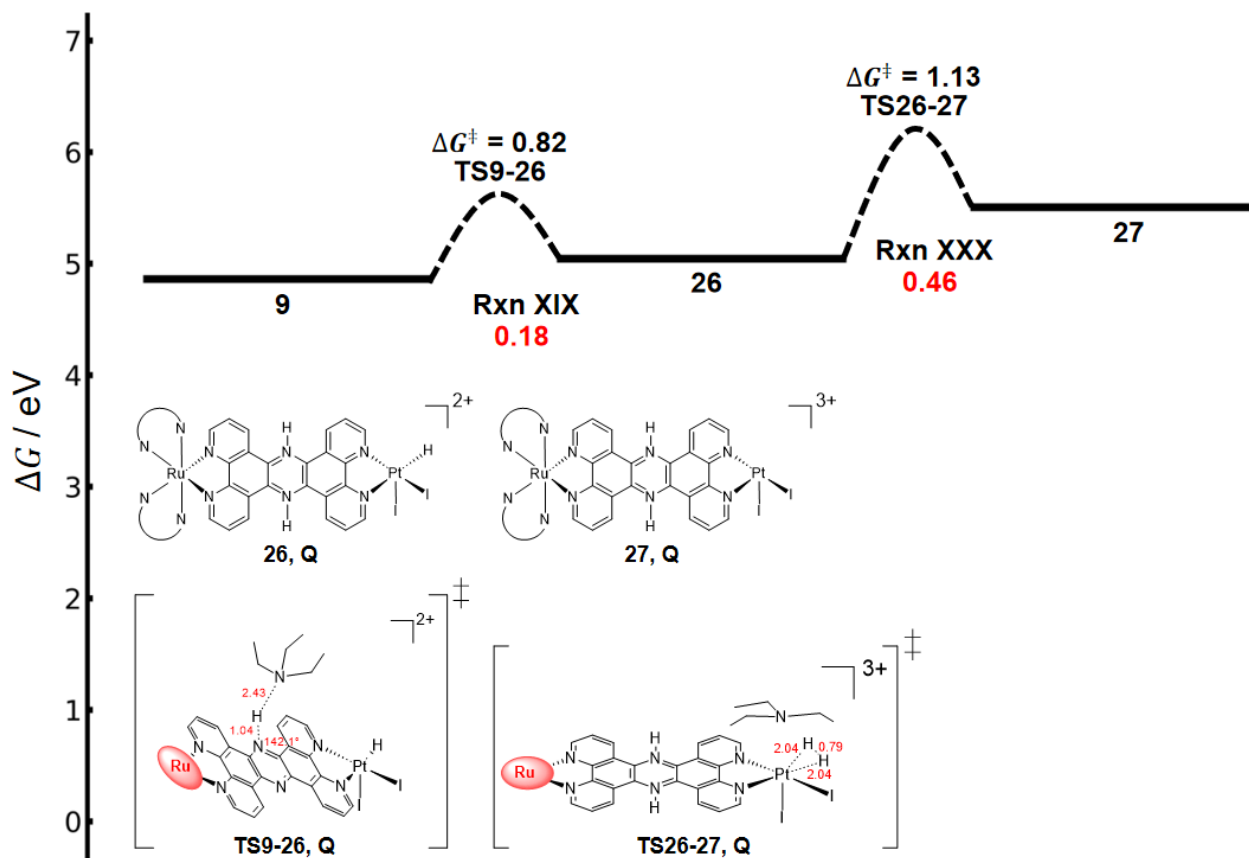

Scheme S10: The reaction energetics plot of deactivation of **RuPtI<sub>2</sub>** by fully protonated of the bridge on intermediate **9** and hydrogen production of the fully bridge protonated **RuPtI<sub>2</sub>**. The number of intermediates and their spin state are written below the molecules with Q = quartet.

## S4 Important Excitation States

### S4.1 Intermediate 1

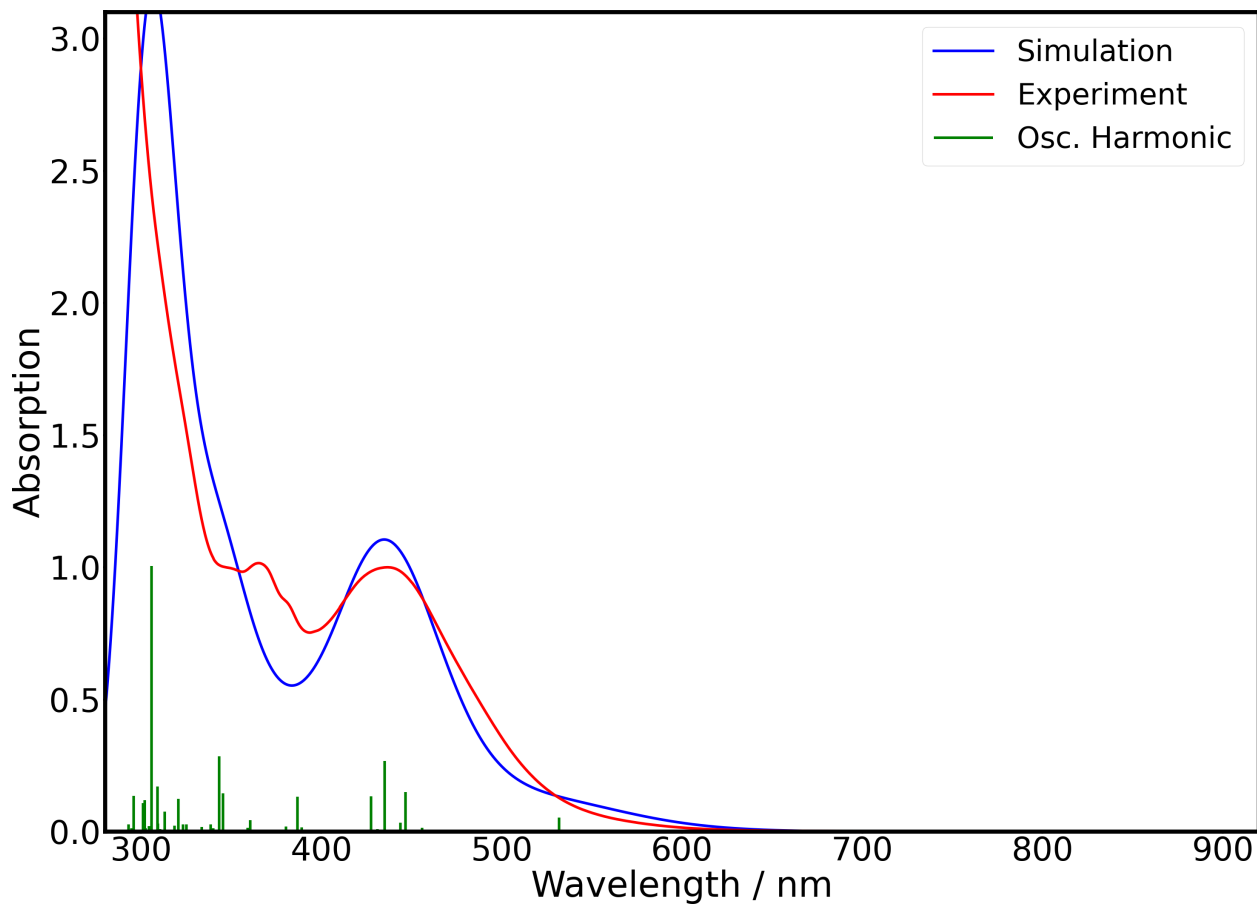

Figure S3: Absorption spectrum of intermediate **1**.

Table S1: Molecular orbital transition of notable singlet-singlet excitation state from TDDFT result on Intermediate **1**. The direction of electron excitation is from red to green.

| State | Transition            | Orbital Transition                                                                  | %     | VEE (eV) | $\lambda$ (nm) | f      |
|-------|-----------------------|-------------------------------------------------------------------------------------|-------|----------|----------------|--------|
| S2    | 236 $\rightarrow$ 239 | 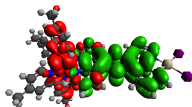   | 95.82 | 2.33     | 531.78         | 0.0534 |
| S13   | 236 $\rightarrow$ 242 |    | 59.81 | 2.78     | 446.78         | 0.1491 |
|       | 236 $\rightarrow$ 243 |    | 31.72 |          |                |        |
| S17   | 233 $\rightarrow$ 239 |    | 19.97 | 2.85     | 435.04         | 0.2676 |
|       | 236 $\rightarrow$ 243 |    | 29.67 |          |                |        |
|       | 237 $\rightarrow$ 244 |    | 32.52 |          |                |        |
|       | 236 $\rightarrow$ 242 |   | 10.07 |          |                |        |
| S20   | 236 $\rightarrow$ 244 |  | 57.67 | 2.90     | 427.64         | 0.1330 |
|       | 237 $\rightarrow$ 243 |  | 39.09 |          |                |        |
| S33   | 233 $\rightarrow$ 241 |  | 80.20 | 3.21     | 386.72         | 0.1314 |
|       | 235 $\rightarrow$ 240 |  | 13.58 |          |                |        |

Table S2: Molecular orbital transition of notable singlet-triplet excitation state from TDDFT result on Intermediate **1**. The direction of electron excitation is from red to green.

| State | Transition            | Orbital Transition                                                                  | %     | VEE (eV) | $\lambda$ (nm) | f      |
|-------|-----------------------|-------------------------------------------------------------------------------------|-------|----------|----------------|--------|
| T1    | 238 $\rightarrow$ 239 | 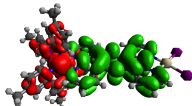   | 67.78 | 2.11     | 588.81         | 0.0000 |
|       | 238 $\rightarrow$ 242 |    | 22.80 |          |                |        |
| T6    | 235 $\rightarrow$ 245 |    | 85.79 | 2.33     | 531.61         | 0.0000 |
| T7    | 238 $\rightarrow$ 244 |    | 74.48 | 2.40     | 516.95         | 0.0000 |
| T22   | 235 $\rightarrow$ 239 |    | 34.77 | 2.75     | 449.50         | 0.0000 |
|       | 235 $\rightarrow$ 241 |   | 16.27 |          |                |        |
| T43   | 238 $\rightarrow$ 245 |  | 99.94 | 3.36     | 368.48         | 0.0000 |

## S4.2 Intermediate 3

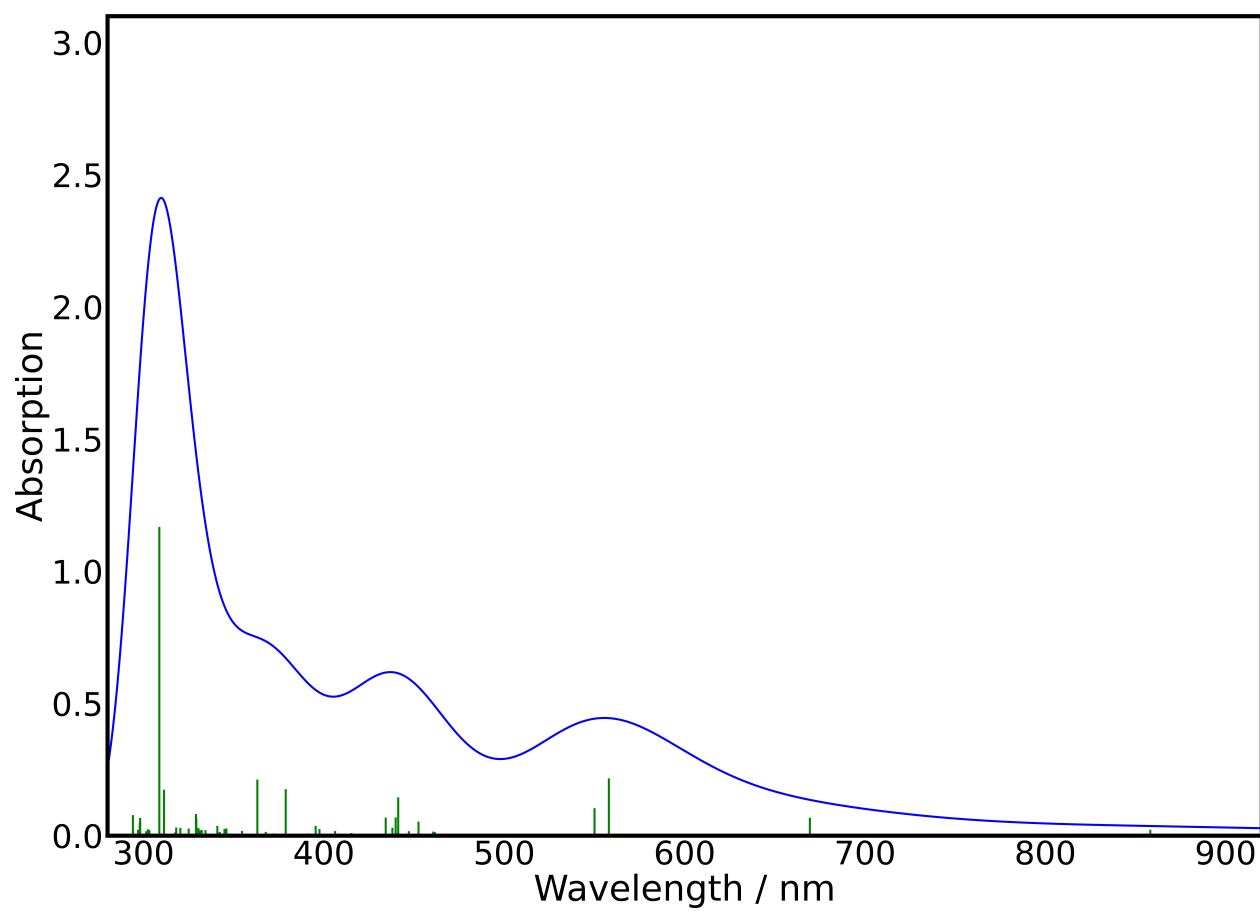

Figure S4: Absorption spectrum of intermediate **3**.



Table S3: Molecular orbital transition of notable excitation state from TDDFT result on Intermediate **3**. The direction of electron excitation is from red to green.

| State | Transition              | Orbital Transition                                                                  | %     | VEE (eV) | $\lambda$ (nm) | f      |
|-------|-------------------------|-------------------------------------------------------------------------------------|-------|----------|----------------|--------|
| D6    | 239A $\rightarrow$ 245A | 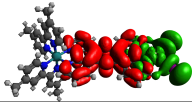   | 99.67 | 1.19     | 1043.43        | 0.0000 |
| D8    | 239A $\rightarrow$ 247A |    | 97.27 | 1.85     | 669.44         | 0.0674 |
| D10   | 239A $\rightarrow$ 249A |    | 39.63 | 2.22     | 557.96         | 0.2169 |
|       | 239A $\rightarrow$ 251A |    | 55.91 |          |                |        |
| D11   | 239A $\rightarrow$ 249A |    | 59.21 | 2.25     | 550.06         | 0.1041 |
|       | 239A $\rightarrow$ 251A |    | 39.37 |          |                |        |
| D35   | 237A $\rightarrow$ 244A |   | 18.42 | 2.81     | 441.16         | 0.1450 |
|       | 237B $\rightarrow$ 239B |  | 18.20 |          |                |        |
|       | 237B $\rightarrow$ 241B |  | 15.29 |          |                |        |
| D76   | 238A $\rightarrow$ 245A |  | 98.28 | 3.38     | 367.22         | 0.0000 |

### S4.3 Intermediate 4

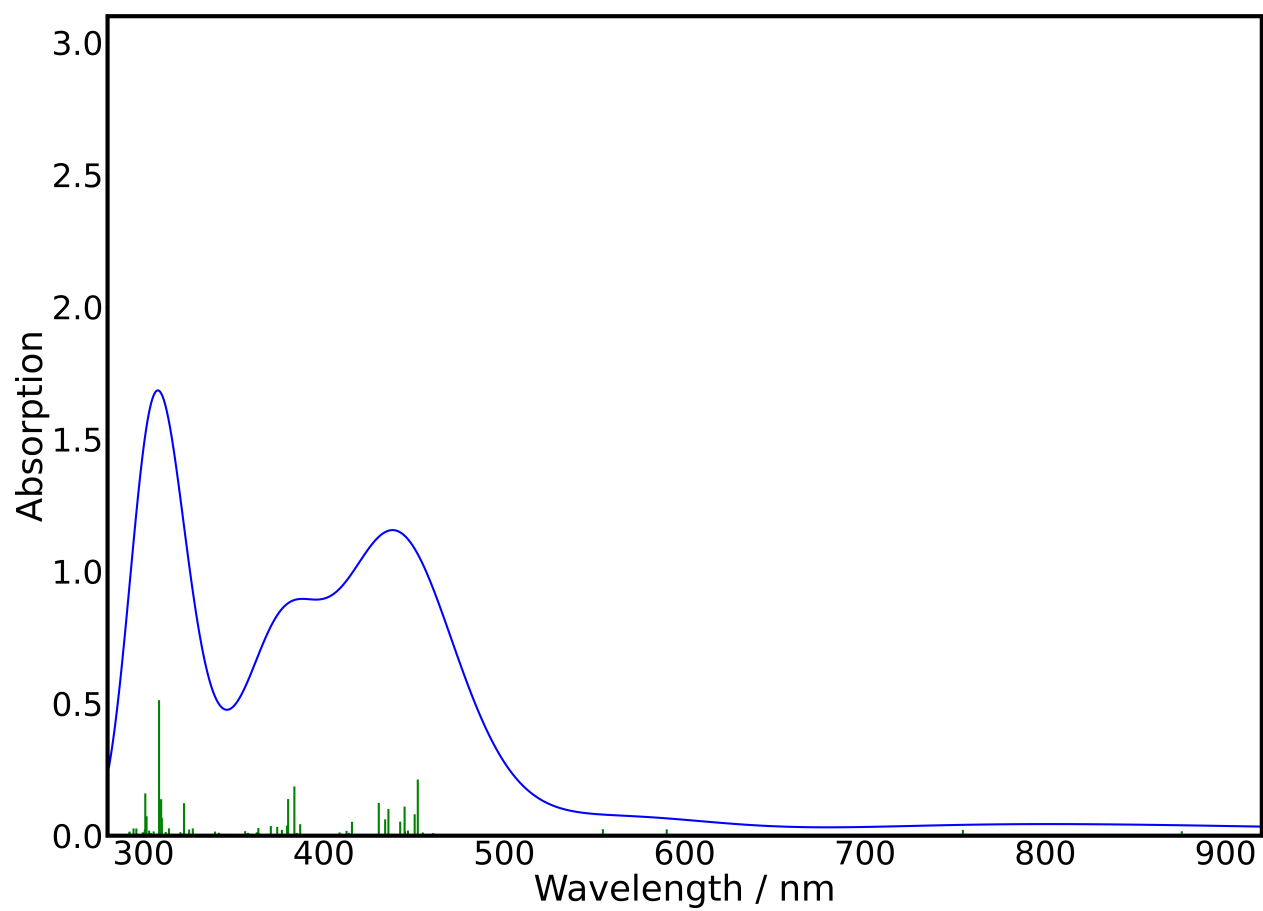

Figure S5: Absorption spectrum of intermediate 4.

Table S4: Molecular orbital transition of notable excitation state from TDDFT result on Intermediate **4**. The direction of electron excitation is from red to green.

| State | Transition              | Orbital Transition                                                                  | %     | VEE (eV) | $\lambda$ (nm) | f      |
|-------|-------------------------|-------------------------------------------------------------------------------------|-------|----------|----------------|--------|
| D5    | 239A $\rightarrow$ 246A | 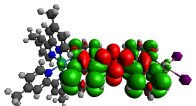   | 74.64 | 2.10     | 590.02         | 0.0241 |
| D7    | 239A $\rightarrow$ 245A |    | 98.43 | 2.17     | 571.99         | 0.0000 |
| D9    | 236B $\rightarrow$ 239B |    | 72.39 | 2.24     | 554.63         | 0.0246 |
| D34   | 236A $\rightarrow$ 242A |    | 15.94 | 2.74     | 452.06         | 0.2127 |
|       | 236B $\rightarrow$ 241B |    | 10.88 |          |                |        |
|       | 236B $\rightarrow$ 242B |   | 22.10 |          |                |        |
| D35   | 236A $\rightarrow$ 244A |  | 15.53 | 2.76     | 450.27         | 0.0811 |
|       | 237A $\rightarrow$ 243A |  | 14.81 |          |                |        |
|       | 237B $\rightarrow$ 243B |  | 11.33 |          |                |        |
| D86   | 238A $\rightarrow$ 245A |  | 99.15 | 3.37     | 367.89         | 0.0000 |

#### S4.4 Intermediate 6

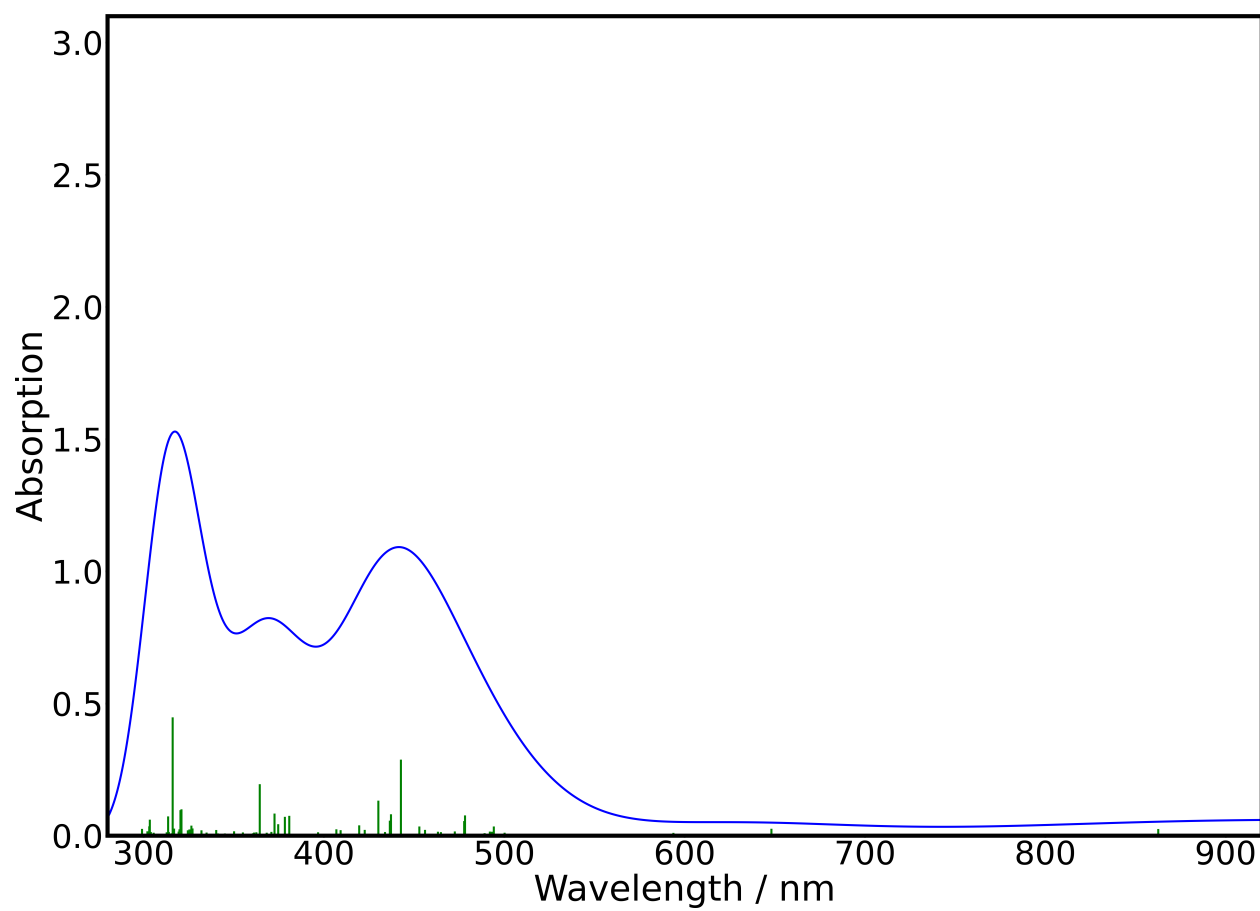

Figure S6: Absorption spectrum of intermediate **6**.

Table S5: Molecular orbital transition of notable excitation state from TDDFT result on Intermediate **6**. The direction of electron excitation is from red to green.

| State | Transition              | Orbital Transition                                                                  | %     | VEE (eV) | $\lambda$ (nm) | f      |
|-------|-------------------------|-------------------------------------------------------------------------------------|-------|----------|----------------|--------|
| T2    | 240A $\rightarrow$ 245A | 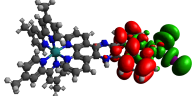   | 98.13 | 0.81     | 1530.43        | 0.0000 |
| T18   | 239A $\rightarrow$ 245A |    | 98.03 | 2.30     | 539.30         | 0.0000 |
| T33   | 237A $\rightarrow$ 241A |    | 16.46 | 2.59     | 478.21         | 0.0769 |
|       | 237A $\rightarrow$ 242A |    | 10.09 |          |                |        |
|       | 239A $\rightarrow$ 247A |    | 40.60 |          |                |        |
| T45   | 233B $\rightarrow$ 239B |    | 38.55 | 2.80     | 442.68         | 0.2876 |
|       | 237B $\rightarrow$ 241B |  | 10.00 |          |                |        |
| T47   | 238B $\rightarrow$ 243B |  | 21.25 | 2.84     | 437.19         | 0.0811 |
| T50   | 237A $\rightarrow$ 241A |  | 21.64 | 2.88     | 430.18         | 0.1324 |
|       | 237A $\rightarrow$ 242A |  | 16.28 |          |                |        |
|       | 237A $\rightarrow$ 244A |  | 18.88 |          |                |        |
| T136  | 238A $\rightarrow$ 245A |  | 99.84 | 3.76     | 330.14         | 0.0000 |

### S4.5 Intermediate 7

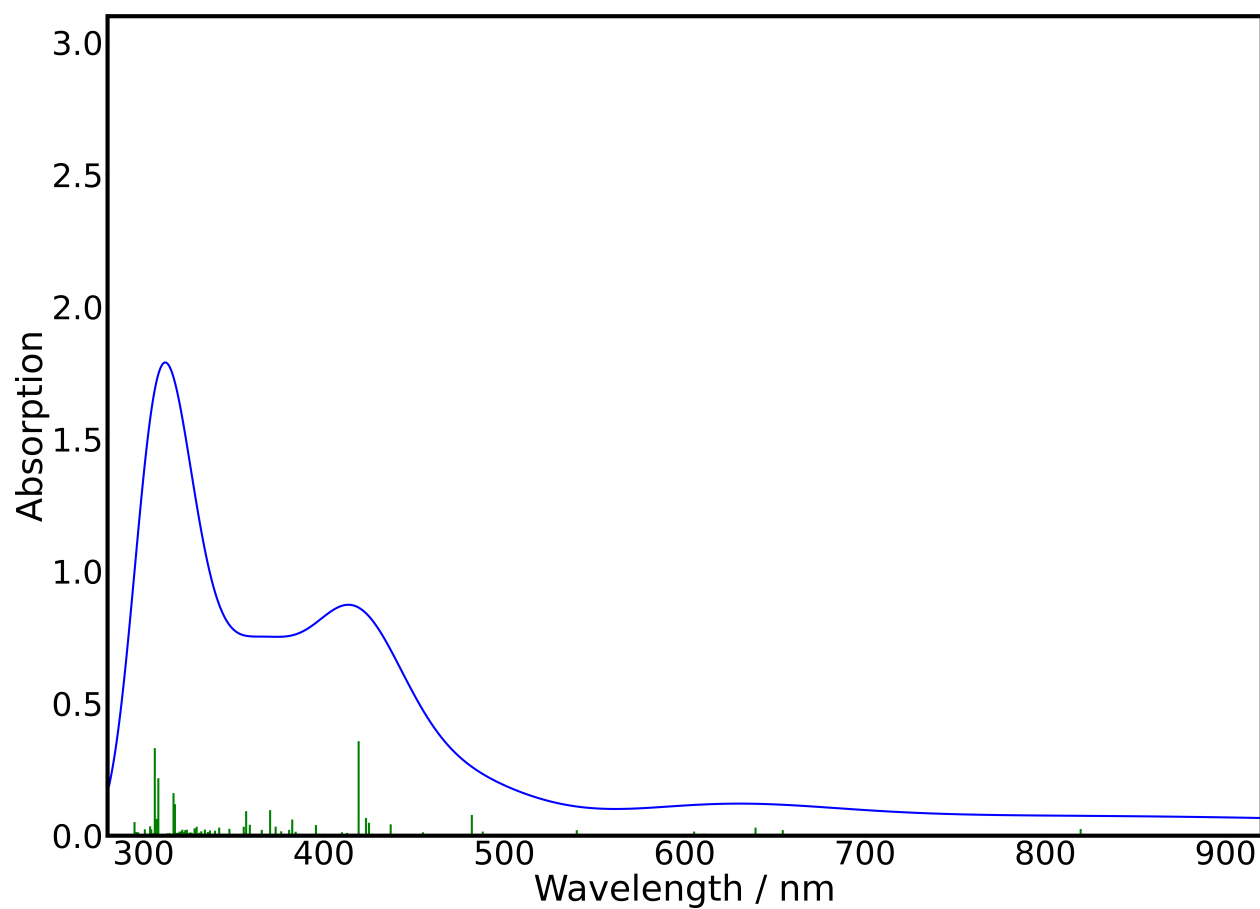

Figure S7: Absorption spectrum of intermediate 7.

Table S6: Molecular orbital transition of notable excitation state from TDDFT result on Intermediate **7**. The direction of electron excitation is from red to green.

| State | Transition              | Orbital Transition                                                                  | %     | VEE (eV) | $\lambda$ (nm) | f      |
|-------|-------------------------|-------------------------------------------------------------------------------------|-------|----------|----------------|--------|
| Qu8   | 241A $\rightarrow$ 246A | 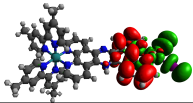   | 97.79 | 0.88     | 1414.59        | 0.0000 |
| Qu24  | 240A $\rightarrow$ 246A |    | 95.11 | 1.96     | 633.97         | 0.0000 |
| Qu30  | 241A $\rightarrow$ 253A |    | 34.90 | 1.94     | 639.34         | 0.0306 |
|       | 241A $\rightarrow$ 254A |    | 49.87 |          |                |        |
| Qu37  | 239A $\rightarrow$ 246A |    | 97.26 | 2.43     | 509.81         | 0.0000 |
| Qu47  | 240A $\rightarrow$ 255A |   | 19.09 | 2.57     | 482.00         | 0.0783 |
|       | 240A $\rightarrow$ 256A |  | 46.73 |          |                |        |
| Qu60  | 239A $\rightarrow$ 252A |  | 34.82 | 2.96     | 419.22         | 0.3576 |
|       | 239A $\rightarrow$ 253A |  | 32.78 |          |                |        |

#### S4.6 Intermediate 13

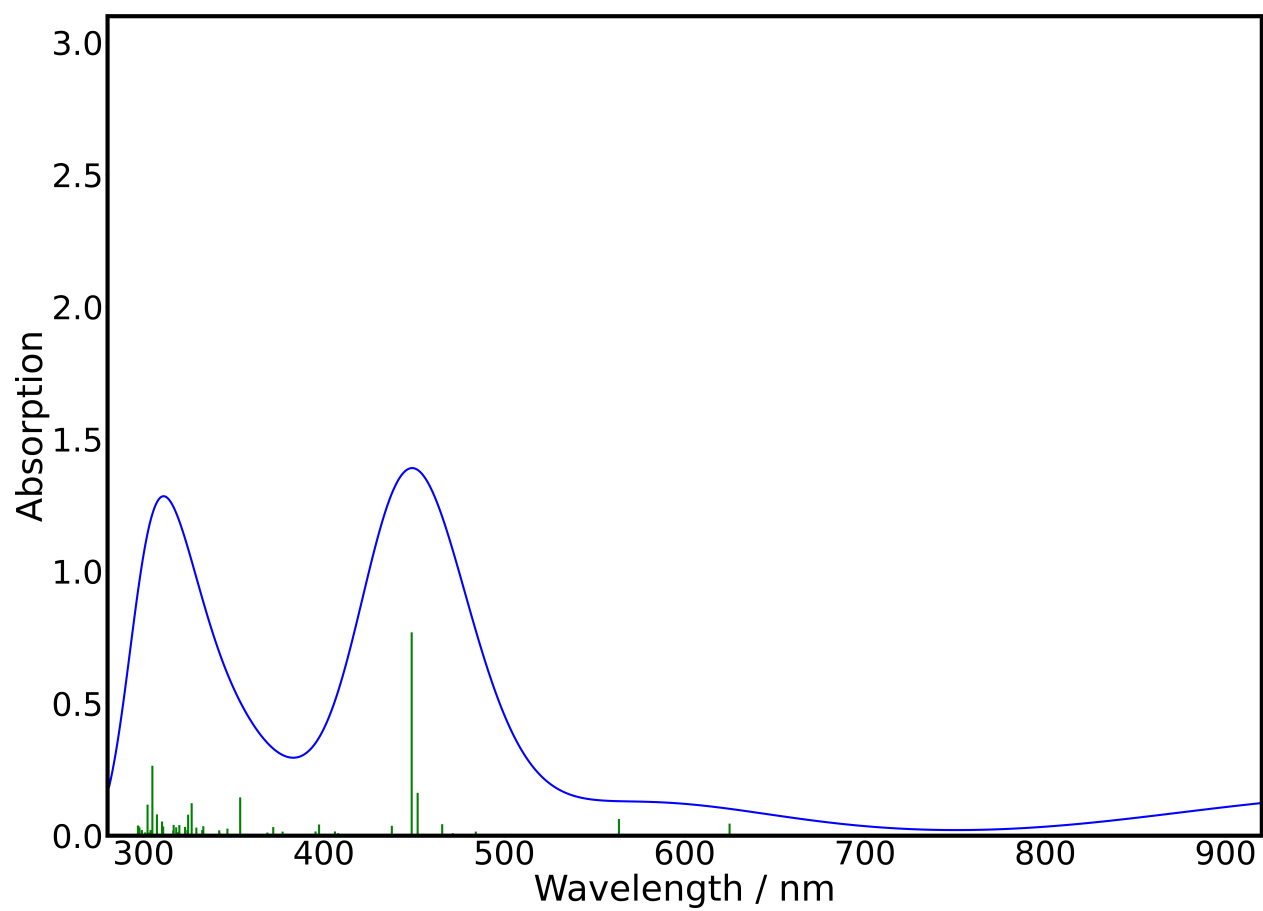

Figure S8: Absorption spectrum of intermediate **13**.



Table S7: Molecular orbital transition of notable excitation state from TDDFT result on intermediate **13**. The direction of electron excitation is from red to green.

| State | Transition            | Orbital Transition                                                                  | %     | VEE (eV) | $\lambda$ (nm) | f      |
|-------|-----------------------|-------------------------------------------------------------------------------------|-------|----------|----------------|--------|
| S1    | 239 $\rightarrow$ 240 | 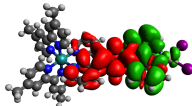   | 98.80 | 1.07     | 1154.36        | 0.0238 |
| S2    | 239 $\rightarrow$ 242 |    | 35.09 | 1.23     | 1010.48        | 0.0947 |
|       | 239 $\rightarrow$ 243 |    | 62.61 |          |                |        |
| S17   | 236 $\rightarrow$ 241 |    | 55.78 | 2.74     | 451.94         | 0.1619 |
|       | 237 $\rightarrow$ 242 |    | 23.12 |          |                |        |
| S18   | 236 $\rightarrow$ 242 |   | 14.77 | 2.76     | 448.69         | 0.7694 |
|       | 239 $\rightarrow$ 251 |  | 66.40 |          |                |        |

### S4.7 Intermediate 16

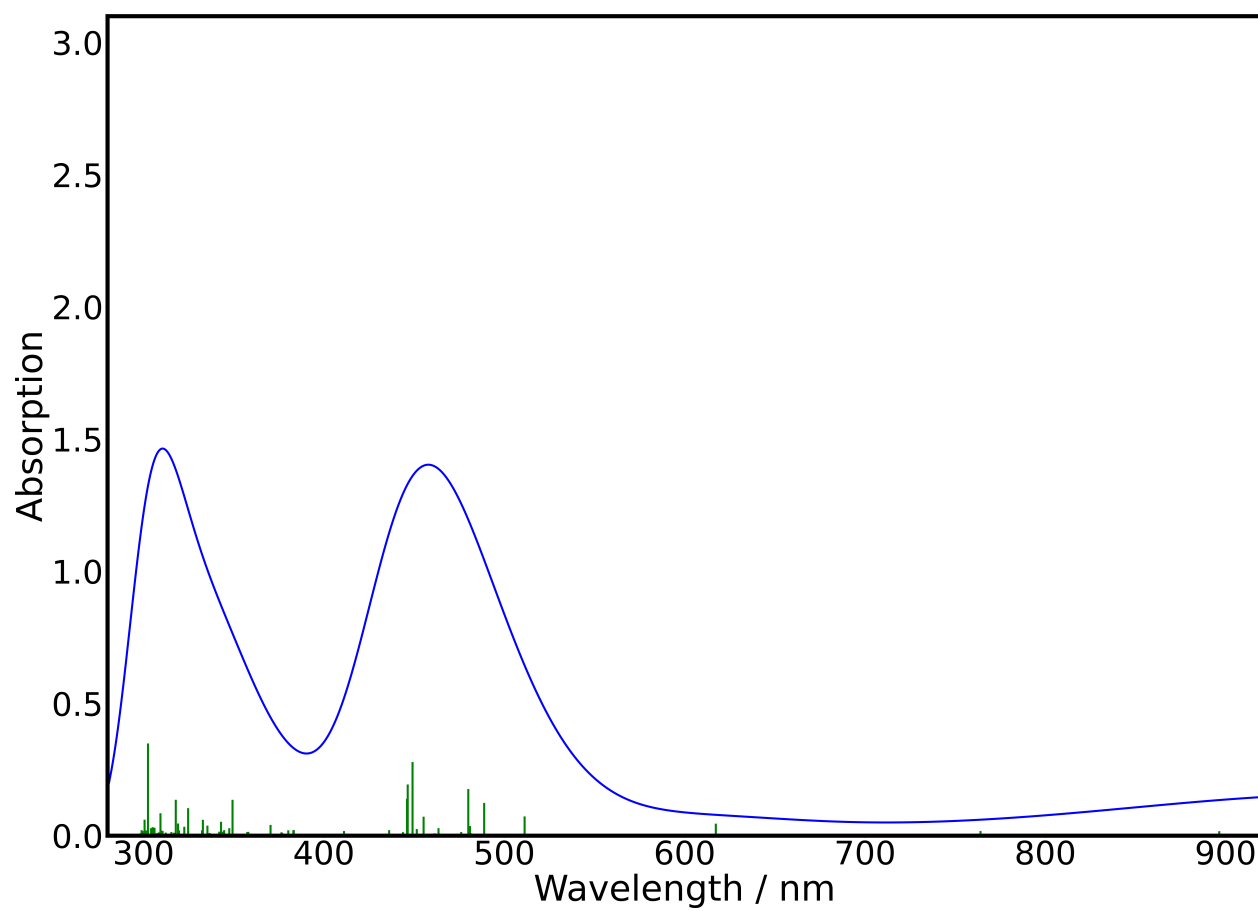

Figure S9: Absorption spectrum of intermediate **16**.

Table S8: Molecular orbital transition of notable excitation state from TDDFT result on intermediate **16**. The direction of electron excitation is from red to green.

| State | Transition              | Orbital Transition                                                                  | %     | VEE (eV) | $\lambda$ (nm) | f      |
|-------|-------------------------|-------------------------------------------------------------------------------------|-------|----------|----------------|--------|
| D7    | 240A $\rightarrow$ 244A | 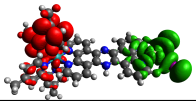   | 99.89 | 0.86     | 1434.92        | 0.0000 |
| D41   | 237A $\rightarrow$ 242A |    | 12.88 | 2.54     | 488.86         | 0.1241 |
|       | 237A $\rightarrow$ 245A |    | 14.65 |          |                |        |
|       | 236B $\rightarrow$ 242B |    | 15.71 |          |                |        |
| D45   | 236A $\rightarrow$ 245A |    | 12.11 | 2.58     | 480.04         | 0.1767 |
|       | 240A $\rightarrow$ 254A |    | 34.94 |          |                |        |
|       | 240A $\rightarrow$ 256A |   | 13.31 |          |                |        |
| D58   | 236B $\rightarrow$ 240B |  | 20.91 | 2.76     | 449.12         | 0.2786 |
| D59   | 236A $\rightarrow$ 241A |  | 13.97 | 2.78     | 446.41         | 0.1939 |
|       | 236A $\rightarrow$ 243A |  | 26.55 |          |                |        |
|       | 239A $\rightarrow$ 249A |  | 11.68 |          |                |        |
| D60   | 236B $\rightarrow$ 240B |  | 48.25 | 2.78     | 446.09         | 0.1393 |

## S5 Coordinate of Intermediates

All optimized equilibrium structures of all intermediates can be found via the open repository Zenodo <https://doi.org/10.5281/zenodo.10457987>.<sup>9</sup>

## References

- (1) Busch, M.; Ahlberg, E.; Ahlberg, E.; Laasonen, K. How to Predict the  $pK_a$  of Any Compound in Any Solvent. *ACS Omega* **2022**, *7*, 17369–17383.
- (2) Busch, M.; Ahlberg, E.; Laasonen, K. Universal Trends between Acid Dissociation Constants in Protic and Aprotic Solvents. *Chem. Eur. J.* **2022**, *28*.
- (3) Busch, M.; Ahlberg, E.; Laasonen, K. From absolute potentials to a generalized computational standard hydrogen electrode for aqueous and non-aqueous solvents. *Phys. Chem. Chem. Phys.* **2021**, *23*, 11727–11737.
- (4) Rumble, J., Ed. *CRC handbook of chemistry and physics*, 104th ed.; CRC Handbook of Chemistry and Physics; CRC Press: London, England, 2023.
- (5) Nørskov, J. K.; Rossmeisl, J.; Logadottir, A.; Lindqvist, L.; Kitchin, J. R.; Bligaard, T.; Jónsson, H. Origin of the Overpotential for Oxygen Reduction at a Fuel-Cell Cathode. *J. Phys. Chem. B* **2004**, *108*, 17886–17892.
- (6) Muckerman, J. T.; Skone, J. H.; Ning, M.; Wasada-Tsutsui, Y. Toward the accurate calculation of  $pK_a$  values in water and acetonitrile. *Biochim. Biophys. Acta* **2013**, *1827*, 882–891.
- (7) Rossini, E.; Knapp, E.-W. Proton solvation in protic and aprotic solvents. *J. Comput. Chem.* **2016**, *37*, 1082–1091.

- (8) Tshepelevitsh, S.; Kütt, A.; Lõkov, M.; Kaljurand, I.; Saame, J.; Heering, A.; Plieger, P. G.; Vianello, R.; Leito, I. On the Basicity of Organic Bases in Different Media. *European Journal of Organic Chemistry* **2019**, 2019, 6735–6748.
- (9) Putra, M. H.; Rau, S.; Groß, A.; Busch, M. *The Relaxed Geometry of Intermediates from Photocatalytic Hydrogen Evolution Reaction of RuPtI2 Photocatalyst*; Zenodo, 2024; <https://doi.org/10.5281/zenodo.10457987>.
